# Supplementary material for: Theoretical study on excited-state intermolecular proton transfer reactions of 1H-pyrrolo[3,2-h]quinoline with water and methanol
Source: Springer Nature journal article supplement (doi:10.1007/s00214-013-1397-x), 2013-09-20
Supplement: MOESM1 [file 214_2013_1397_MOESM1_ESM.pdf]

## Supplementary Information

### Theoretical study on excited-state intermolecular proton transfer reactions of 1*H*-pyrrolo[3,2-*h*]quinoline with water and methanol

Nawee Kungwan,<sup>\* a</sup> Rathawat Daengngern,<sup>a</sup> Tammarat Piansawan,<sup>a</sup>

Supa Hannongbua,<sup>b</sup> and Mario Barbatti <sup>c</sup>

*Department of Chemistry, Faculty of Science, Chiang Mai University, Chiang Mai 50200, Thailand*

*Department of Chemistry, Faculty of Science, Kasetsart University, Bangkhen Campus, Bangkok 10930,  
Thailand*

*Max-Planck-Institut für Kohlenforschung, Kaiser-Wilhelm-Platz 1, D-45470, Mülheim an der Ruhr, Germany*

\*Corresponding author. E-mail: naweekung@gmail.com (Nawee Kungwan).

Phone: +66-53-943341 ext 101. Fax: +66-53-892277.

<sup>a</sup> Department of Chemistry, Chiang Mai University.

<sup>b</sup> Department of Chemistry, Kasetsart University.

<sup>c</sup> Max-Planck-Institut für Kohlenforschung.

**TABLE S1: Cartesian coordinates of ground-state optimized structures of  $\text{PQ}(\text{H}_2\text{O})_{n=1,2}$  and  $\text{PQ}(\text{MeOH})_{n=1,2}$  complexes at RI-MP2/SVP level (in Å).**

**1.  $\text{PQ}(\text{H}_2\text{O})$**

|   |            |            |            |
|---|------------|------------|------------|
| C | 0.0360720  | 1.2314735  | 2.5278182  |
| C | 0.0282944  | 0.0537676  | 0.5368212  |
| C | -0.0261479 | -1.2086393 | 1.2208959  |
| C | -0.0093444 | -1.1719288 | 2.6337179  |
| C | 0.0126661  | 0.0480040  | 3.2925082  |
| C | -0.0286859 | 0.0113166  | -0.8857876 |
| C | 0.0075611  | -1.2130818 | -1.6077759 |
| C | -0.0330693 | -2.4449345 | -0.8962393 |
| C | -0.0185531 | -2.4376019 | 0.4826203  |
| C | 0.0315020  | 0.5162310  | -3.0552963 |
| C | 0.0234865  | -0.8697983 | -2.9918173 |
| H | 0.0525878  | 2.2083381  | 3.0234713  |
| H | -0.0295414 | -2.1109717 | 3.1950075  |
| H | 0.0183540  | 0.1032559  | 4.3828642  |
| H | -0.0328922 | -3.3933461 | -1.4411472 |
| H | -0.0435466 | -3.3771926 | 1.0417318  |
| H | 0.0483748  | 1.1761420  | -3.9210613 |
| H | 0.0363420  | -1.5509381 | -3.8404767 |
| N | 0.0315905  | 1.2432093  | 1.1978659  |
| N | 0.0091642  | 1.0340944  | -1.7864674 |
| H | 0.0087457  | 2.0320747  | -1.5243341 |
| H | 0.0675725  | 2.8450522  | 0.2416771  |
| O | -0.0045371 | 3.5136274  | -0.4782757 |
| H | -0.9036893 | 3.8457380  | -0.3711181 |

## 2. PQ(H<sub>2</sub>O)<sub>2</sub>

|   |            |            |            |
|---|------------|------------|------------|
| C | -0.0928086 | 2.6430962  | 0.5633971  |
| C | -0.0066211 | 0.3278090  | 0.5578257  |
| C | -0.0516933 | 0.2755554  | 1.9943784  |
| C | -0.1021613 | 1.5092044  | 2.6822030  |
| C | -0.1427950 | 2.6977825  | 1.9694839  |
| C | -0.0310340 | -0.9196895 | -0.1289223 |
| C | 0.0921418  | -2.1574789 | 0.5643650  |
| C | 0.0838536  | -2.1699028 | 1.9868757  |
| C | 0.0363233  | -0.9795099 | 2.6804498  |
| C | 0.0441076  | -2.5412617 | -1.6543528 |
| C | 0.1215316  | -3.1814105 | -0.4267294 |
| H | -0.1000433 | 3.5616985  | -0.0336766 |
| H | -0.1235353 | 1.5112369  | 3.7761987  |
| H | -0.1922683 | 3.6631309  | 2.4770085  |
| H | 0.1492155  | -3.1192084 | 2.5263763  |
| H | 0.0230315  | -0.9744019 | 3.7739897  |
| H | 0.0308073  | -2.9527124 | -2.6623040 |
| H | 0.1931803  | -4.2550587 | -0.2638955 |
| N | -0.0384230 | 1.5040838  | -0.1234283 |
| N | -0.0326949 | -1.1852752 | -1.4660430 |
| H | -0.1713659 | -0.5212314 | -2.2467716 |
| H | 0.3224278  | 2.0912754  | -1.7799771 |
| O | 0.5289899  | 2.5541600  | -2.6282648 |
| H | 1.4895852  | 2.6348740  | -2.6063325 |
| H | -1.3725534 | 0.5486031  | -3.9238357 |
| O | -0.4428772 | 0.3284894  | -3.7937997 |
| H | -0.0413437 | 1.1984826  | -3.5761630 |

### 3. PQ(MeOH)

|   |            |            |            |
|---|------------|------------|------------|
| C | 0.2380480  | 2.3495641  | 1.3814058  |
| C | 0.0792577  | 0.1845687  | 0.5788947  |
| C | -0.0672966 | -0.3537312 | 1.9028404  |
| C | -0.0891211 | 0.5722259  | 2.9704947  |
| C | 0.0724397  | 1.9256868  | 2.7148738  |
| C | 0.1451799  | -0.7555688 | -0.4886679 |
| C | -0.0683888 | -2.1463812 | -0.2860538 |
| C | -0.2260361 | -2.6424662 | 1.0385330  |
| C | -0.2554009 | -1.7613011 | 2.0990484  |
| C | 0.2069524  | -1.7385713 | -2.4873383 |
| C | -0.0053981 | -2.7595709 | -1.5722123 |
| H | 0.3723745  | 3.4121451  | 1.1514371  |
| H | -0.2181345 | 0.2078249  | 3.9941184  |
| H | 0.0699347  | 2.6591362  | 3.5235579  |
| H | -0.3652594 | -3.7137261 | 1.2100297  |
| H | -0.3828586 | -2.1292809 | 3.1209750  |
| H | 0.3141034  | -1.7816964 | -3.5699534 |
| H | -0.1065323 | -3.8179502 | -1.8045088 |
| N | 0.2513088  | 1.5141974  | 0.3462507  |
| N | 0.2875392  | -0.5394949 | -1.8274600 |
| H | 0.4237795  | 0.3947731  | -2.2478725 |
| H | 0.4446535  | 2.1101121  | -1.3625786 |
| O | 0.3969809  | 2.1854972  | -2.3458722 |
| C | -0.9129708 | 2.6128436  | -2.6455641 |
| H | -1.1187785 | 3.6227967  | -2.2530368 |
| H | -1.0228027 | 2.6480006  | -3.7374837 |
| H | -1.6806963 | 1.9274413  | -2.2447501 |

#### 4. PQ(MeOH)<sub>2</sub>

|   |            |            |            |
|---|------------|------------|------------|
| C | -0.3309564 | 2.6102028  | -0.0901010 |
| C | -0.0707731 | 0.4753580  | 0.7760259  |
| C | -0.1518415 | 0.9608463  | 2.1270122  |
| C | -0.3178941 | 2.3535975  | 2.3000691  |
| C | -0.4284862 | 3.1816706  | 1.1928557  |
| C | 0.0209589  | -0.9347968 | 0.6056910  |
| C | 0.2282975  | -1.8091704 | 1.7097257  |
| C | 0.1830949  | -1.2899852 | 3.0336249  |
| C | 0.0189234  | 0.0645898  | 3.2321327  |
| C | 0.2585710  | -2.9948423 | -0.2057018 |
| C | 0.3623233  | -3.1223915 | 1.1712874  |
| H | -0.3816496 | 3.2357885  | -0.9882322 |
| H | -0.3709207 | 2.7643079  | 3.3129120  |
| H | -0.5656632 | 4.2592716  | 1.3015968  |
| H | 0.3114913  | -1.9596050 | 3.8889654  |
| H | -0.0246925 | 0.4757381  | 4.2445822  |
| H | 0.2943125  | -3.7538939 | -0.9855794 |
| H | 0.5164718  | -4.0484163 | 1.7219045  |
| N | -0.1721616 | 1.3042284  | -0.2969643 |
| N | 0.0710315  | -1.6769208 | -0.5372991 |
| H | -0.1349072 | -1.3591994 | -1.5040939 |
| H | 0.3792965  | 1.1845567  | -1.9586109 |
| O | 0.7467590  | 1.2204733  | -2.8773251 |
| O | -0.6362663 | -1.0311751 | -3.1413550 |
| H | -0.0938423 | -0.2230544 | -3.2890995 |
| C | 2.1490336  | 1.1194756  | -2.7524722 |
| H | 2.4577504  | 0.1952868  | -2.2337291 |
| H | 2.5859317  | 1.1096042  | -3.7594526 |
| H | 2.5729148  | 1.9773515  | -2.2045429 |
| C | -1.9883780 | -0.6231879 | -3.1208003 |
| H | -2.3227371 | -0.2647326 | -4.1078698 |
| H | -2.6029810 | -1.4907985 | -2.8471439 |
| H | -2.1694199 | 0.1748790  | -2.3805612 |

**TABLE S2: Relative ground ( $S_0$ ) and excited states ( $\pi\pi^*$ ,  $\pi\sigma^*$ ) energies (kcal.mol<sup>-1</sup>) for characteristic points of normal (N), intermediary structure (IS), and tautomer (T) along the reaction pathways for one selected trajectory of each complex.**

| State         | Form | Complex              |                                   |          |                       |
|---------------|------|----------------------|-----------------------------------|----------|-----------------------|
|               |      | PQ(H <sub>2</sub> O) | PQ(H <sub>2</sub> O) <sub>2</sub> | PQ(MeOH) | PQ(MeOH) <sub>2</sub> |
| $S_0$         | N    | 0                    | 0                                 | 0        | 0                     |
|               | IS1  | 58                   | 38                                | 53       | 74                    |
|               | IS2  | 50                   | 20                                | 83       | 102                   |
|               | IS3  | -                    | 33                                | -        | 87                    |
|               | T    | 34                   | 25                                | 33       | 51                    |
| $\pi\pi^*$    | N    | 100                  | 89                                | 110      | 100                   |
|               | IS1  | 141                  | 123                               | 137      | 138                   |
|               | IS2  | 133                  | 105                               | 163      | 176                   |
|               | IS3  | -                    | 122                               | -        | 167                   |
|               | T    | 102                  | 102                               | 112      | 115                   |
| $\pi\sigma^*$ | N    | 175                  | 186                               | 184      | 176                   |
|               | IS1  | 232                  | 217                               | 233      | 249                   |
|               | IS2  | 226                  | 201                               | 216      | 266                   |
|               | IS3  | -                    | 204                               | -        | 240                   |
|               | T    | 162                  | 203                               | 167      | 213                   |

**TABLE S3: Average relative ground ( $S_0$ ) and excited states ( $\pi\pi^*$ ) energies (kcal.mol<sup>-1</sup>) of all ESPT trajectories for each complex for characteristic points.**

| State           | Form | Complex              |                                   |          |                       |
|-----------------|------|----------------------|-----------------------------------|----------|-----------------------|
|                 |      | PQ(H <sub>2</sub> O) | PQ(H <sub>2</sub> O) <sub>2</sub> | PQ(MeOH) | PQ(MeOH) <sub>2</sub> |
| $S_0$           | N    | 0                    | 0                                 | 0        | 0                     |
|                 | IS1  | 34                   | 28                                | 32       | 25                    |
|                 | IS2  | 28                   | 31                                | 33       | 32                    |
|                 | IS3  | -                    | 34                                | -        | 34                    |
|                 | T    | 23                   | 27                                | 29       | 27                    |
| $S_1(\pi\pi^*)$ | N    | 91                   | 87                                | 96       | 87                    |
|                 | IS1  | 94                   | 95                                | 93       | 87                    |
|                 | IS2  | 83                   | 91                                | 84       | 86                    |
|                 | IS3  | -                    | 88                                | -        | 82                    |
|                 | T    | 83                   | 85                                | 83       | 81                    |

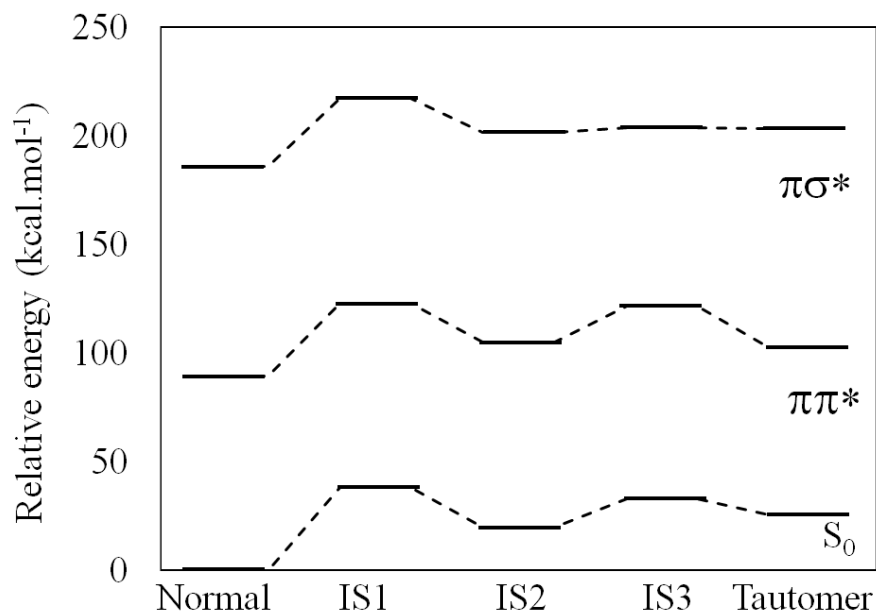

**Fig S1.** Potential energy diagram of a selected trajectory for PQ(H<sub>2</sub>O)<sub>2</sub> complex at ground state (S<sub>0</sub>) and excited states (ππ\*, πσ\*) computed at RI-ADC(2)/SVP-SV(P) level.

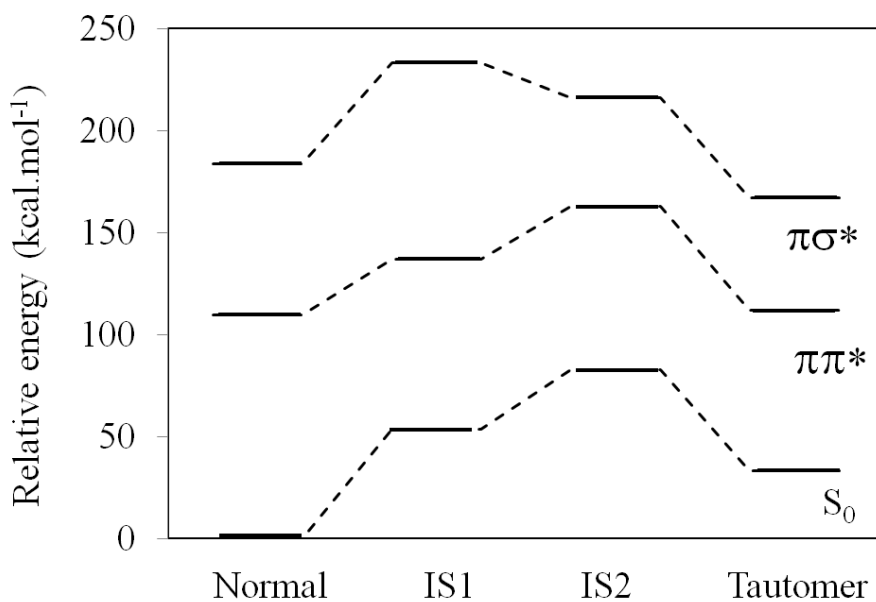

**Fig S2.** Potential energy diagram of a selected trajectory for PQ(MeOH) complex at ground state (S<sub>0</sub>) and excited states (ππ\*, πσ\*) computed at RI-ADC(2)/SVP-SV(P) level.

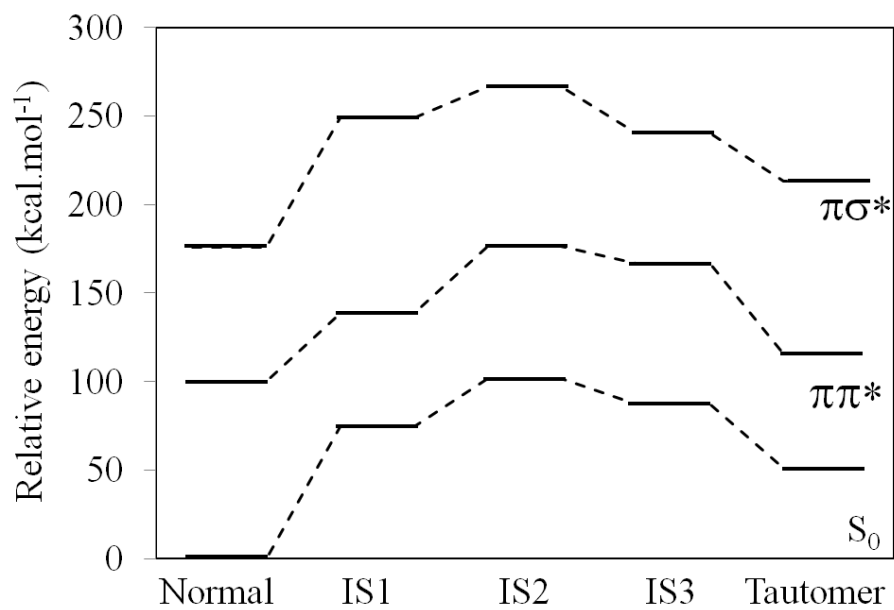

**Fig S3.** Potential energy diagram of a selected trajectory for PQ(MeOH)<sub>2</sub> complex at ground state ( $S_0$ ) and excited states ( $\pi\pi^*$ ,  $\pi\sigma^*$ ) computed at RI-ADC(2)/SVP-SV(P) level.



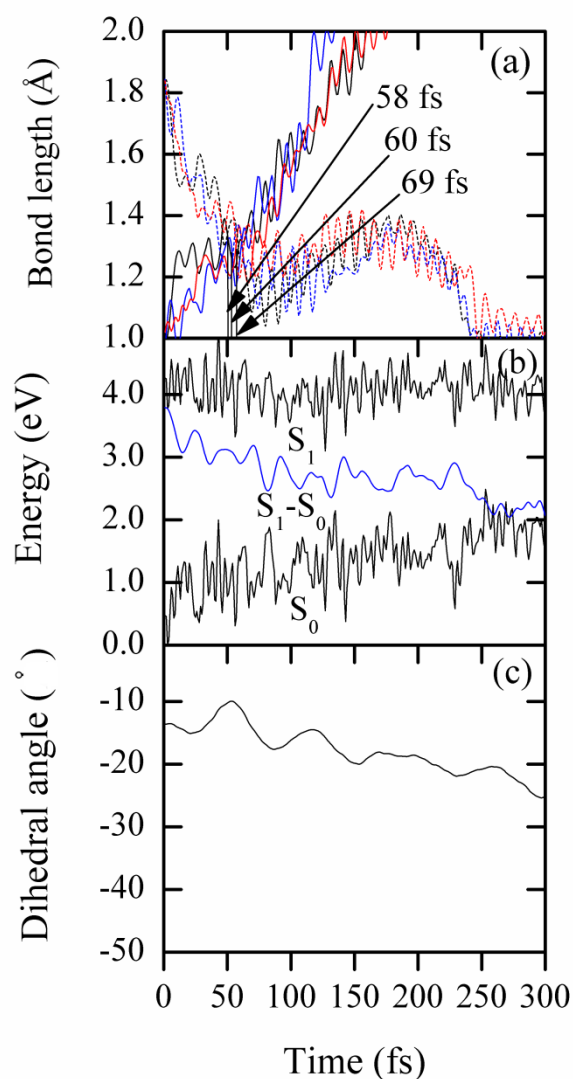

**Fig S4.** Average values over 3 trajectories of PQ(H<sub>2</sub>O)<sub>2</sub> complex exhibiting excited-state triple , as a function of time: (a) Average lengths of broken and new bonds; N1–H1 and O1···H1 in black, O1–H2 and O2···H2 in blue, and O2–H3 and N2···H3 in red (b) Average relative energies of the excited state (S<sub>1</sub>), ground state (S<sub>0</sub>), and the S<sub>1</sub>-S<sub>0</sub> energy gap and (c) Average dihedral angle of O1N1N2O2.

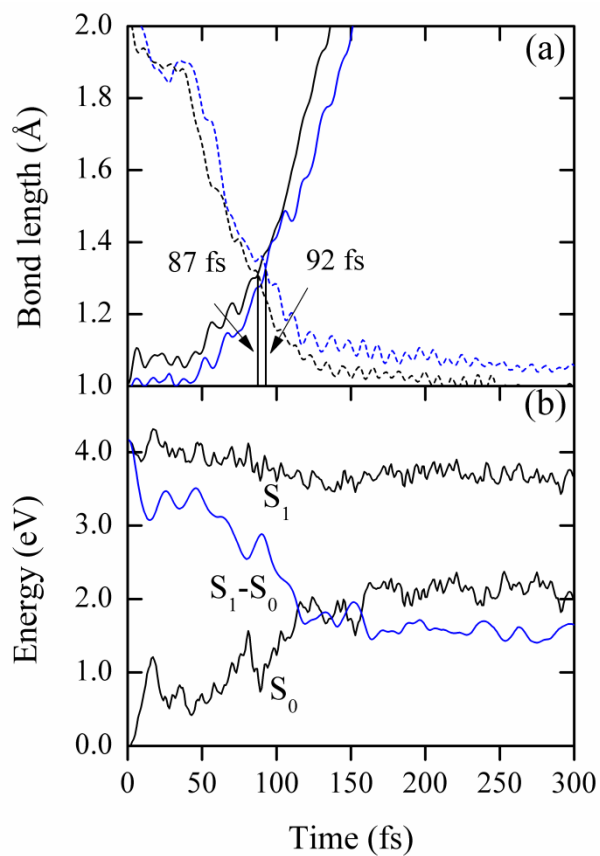

**Fig S5.** Average values over 36 trajectories of PQ(MeOH) complex exhibiting excited-state double proton transfer, as a function of time: (a) Average lengths of broken and new bonds; N1-H1 and O1...H1 in black and O1-H2 and N2...H2 in blue (b) Average relative energies of the excited state ( $S_1$ ), ground state ( $S_0$ ), and the  $S_1$ - $S_0$  energy gap.

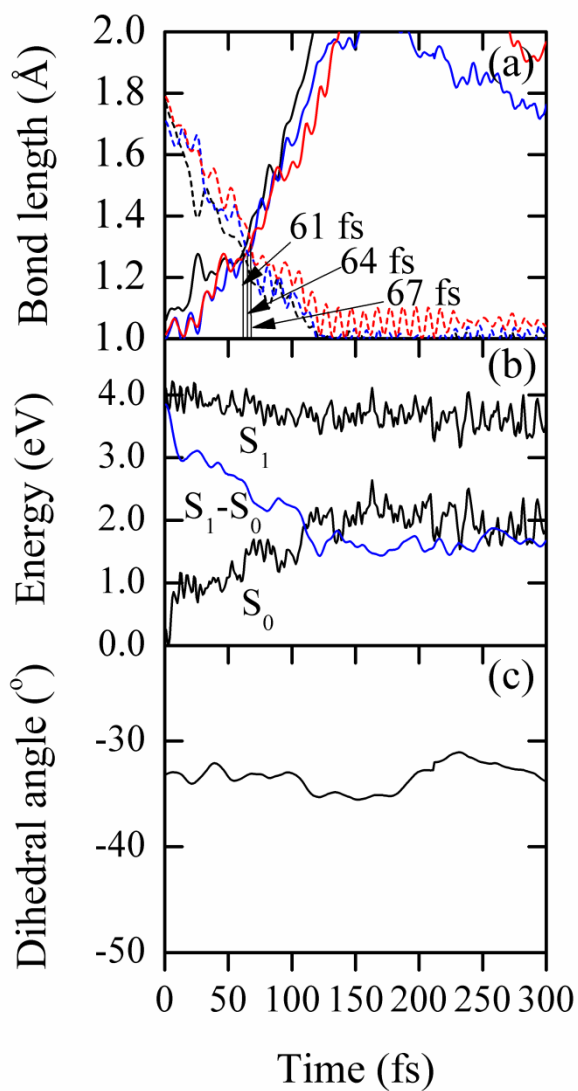

**Fig S6.** Average values over 14 trajectories of PQ(MeOH)<sub>2</sub> complex exhibiting excited-state triple proton transfer, as a function of time: (a) Average lengths of broken and new bonds; N1-H1 and O1...H1 in black, O1-H2 and O2...H2 in blue, and O2-H3 and N2...H3 in red (b) Average relative energies of the excited state ( $S_1$ ), ground state ( $S_0$ ), and the  $S_1$ - $S_0$  energy gap and (c) Average dihedral angle of O1N1N2O2.
